# Supplementary material for: Novel chemical recycling of polycarbonate (PC) waste into bis-hydroxyalkyl ethers of bisphenol A for use as PU raw materials
Source: Royal Society of Chemistry journal article supplement (doi:10.1039/b609638g), 2006-09-26
Supplement: b609638g.pdf [file b609638g.pdf]

Supplementary material for B609638G

Title: Novel chemical recycling of polycarbonate (PC) waste into bis-hydroxyalkyl ethers of bisphenol A for use as PU raw materials

Authors: Shenghong A. Dai, Chao-Hsing Lin, Hsing-Yo Lin and Wei-Zhi Liao

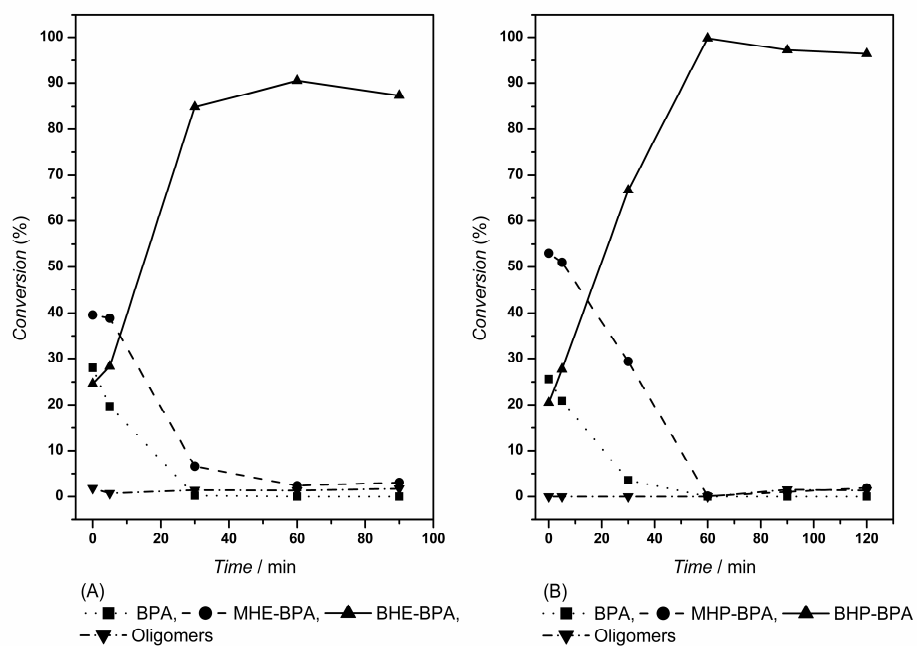

Fig. 1: Conversion of (A) BHE-BPA and (B) BHP-BPA

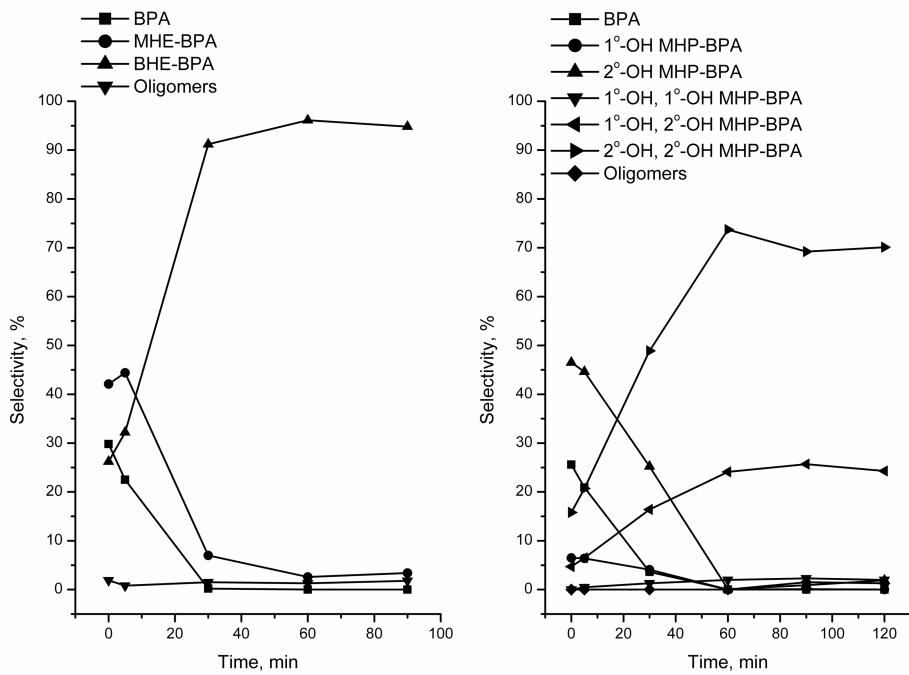

Fig. 2: Selectivity of (A) BHE-BPA and (B) BHP-BPA
